# Supplementary material
Source: publisher figshare collection journal article supplement (https://acs.figshare.com/ndownloader/files/9420169)
Supplement: Supplementary file 1 [file 9420169]

## **Supporting Information**

### **Oxidation of Ce(III) to Ce(IV) by ozone in nitric acid medium using a static mixer: Mathematical modeling and experimental validation**

Sukhdeep Singh<sup>1\*</sup>, Tessy Vincent<sup>1</sup>, Ashok N. Bhaskarwar<sup>2</sup>, Trushit Makwana<sup>1</sup>

<sup>1</sup>Process Development Division, Nuclear Recycle Group, Bhabha Atomic Research Centre,  
Trombay, Mumbai, 400085, India

<sup>2</sup>Department of Chemical Engineering, Indian Institute of Technology, Hauz Khas, New  
Delhi, 110016, India

\*Corresponding author: Sukhdeep Singh, Email: [sukhdeep@barc.gov.in](mailto:sukhdeep@barc.gov.in),

Phone: +91-22-25591431, Fax: +91-22-25505185

## 1 Pre-calculated value of mass transfer enhancement factor $E$ for assumption (d)

Mass transfer enhancement factor  $E$  can be implicitly expressed<sup>a</sup> by the following eqs S1-S3.

$$E = \frac{\phi \sqrt{\frac{E_{\infty} - E}{E_{\infty} - 1}}}{\tanh\left(\phi \sqrt{\frac{E_{\infty} - E}{E_{\infty} - 1}}\right)} \quad (\text{S1})$$

$$E_{\infty} = \left(1 + \frac{D_B C_B}{\nu_B D_A C_{AS}}\right) \quad (\text{S2})$$

$$\phi = \frac{\sqrt{\left(\frac{2}{m+1}\right) k_{m,n} C_{AS}^{n-1} C_B^m D_A}}{k_L} \quad (\text{S3})$$

For the calculation of mass transfer enhancement factor for an infinitely fast reaction  $E_{\infty}$ , diffusivity  $D_B$  of B, i.e. of Ce(III), in aqueous solution was estimated from the well-known Stokes-Einstein equation (eq S4), by taking a hydrated radius<sup>b</sup>  $r_B$  of 261 pm, as shown below,

$$D_B = \frac{k_B T}{6\pi\mu_L r_B} \quad (\text{S4})$$

where  $k_B$  is the Boltzmann constant equal to  $1.38 \times 10^{-23}$  J/K.

Diffusivity  $D_A$  of ozone in water was computed from eq 27, and solubility  $C_{AS}$  from eqs 5-7. Value of  $\nu_B$ , the stoichiometric coefficient of B in Ce(III) oxidation reaction, was 2.

For estimating the Hatta number  $\phi$ , in view of eq 10, the original rate constant  $k_{m,n}$  of eq S3 for a (m, n)<sup>th</sup> order reaction, was substituted here as the product of rate constant  $k$  and nitric acid concentration term i.e.  $C_C^{0.54}$  in eq S5. This was because, eq 10 involved three species (A, B and C), but eq S3 for Hatta number calculation had only two species i.e. A and B. Therefore, term containing nitric acid concentration was coupled along with the rate constant  $k$ , considering its relatively abundance with respect to Ce(III) and insignificant change in magnitude over time during the reaction.

$$k_{m,n} = kC_C^p \quad (\text{S5})$$

Liquid film mass transfer coefficient  $k_L$  can be estimated from eq S6, on dividing the volumetric mass transfer coefficient  $k_L a$  (eq 18) by the specific interfacial area  $a$ .

$$k_L = \frac{k_L a}{a} \quad (\text{S6})$$

Specific interfacial area  $a$  is expressed as a function of gas and liquid superficial velocities, and for a ‘Lightnin’ type of static mixer is given by eq S7<sup>c</sup>.

$$a = 2990 u_L^{0.01} u_G^{0.9} \quad (\text{S7})$$

Such an empirical correlation for a Sulzer SMX type of mixer was not available from literature, so the one that for a ‘Lightnin’ type was adapted for the approximation of  $k_L$ .

Using all the eqs S2-S7, mass transfer enhancement factor  $E$  can be calculated from the implicit eq S1, numerically. Under one of the best experimental conditions ( $C_B = 0.1$  M,  $C_C = 4$  M,  $G_0 = 29 \pm 1.5$  g/m<sup>3</sup> (NTP),  $Q_G = 5$  L/min,  $Q_L = 11$  L/min and  $T_C = 35.7$  °C), the value of  $E$  was calculated to be **1.0504** only, which justifies the assumption (d) in the manuscript.

## 2 Calculation of ozone partial pressure from analyzer reading at NTP

Ozone analyser displays the gas concentration  $G_0$  in g/m<sup>3</sup> at normal conditions of 0°C and 1 atm (NTP), but in the model we need this concentration in terms of partial pressure  $p_A$  (atm) at actual temperature and pressure (1 atm only) of the process, in order to calculate the ozone solubility using eq 6.

For this we have derived eq 7 directly correlating the analyser reading  $G_0$  and ozone partial pressure  $p_A$ ; starting from the ideal gas equation (eq S8), as shown below.

$$p_A V = n_A RT \quad (\text{S8})$$

Putting moles of ozone in terms of mass and molecular mass and rearranging, we got eq S9.

$$p_A = \left( \frac{m_A}{V} \right) \frac{RT}{M_A} \Leftrightarrow G_A \frac{RT}{M_A} \quad (\text{S9})$$

Now expressing  $G_A$  in terms of  $G_0$  after having correction for process temperature  $T$  and pressure  $P$ , as per ideal gas equation (with  $P = P_0$ ), we have eq S10.

$$\frac{P_0 V_0}{T_0} = \frac{PV}{T} \Leftrightarrow \frac{P_0 V_0}{m_A T_0} = \frac{PV}{m_A T} \Leftrightarrow \frac{P_0}{G_0 T_0} = \frac{P}{G_A T} \Rightarrow G_A = G_0 \left( \frac{T_0}{T} \right) \quad (\text{S10})$$

Substituting  $G_A$  in eq S9 by  $G_A$  in eq S10, we arrive at eq S11.

$$p_A = G_0 \frac{RT_0}{M_A} \quad (\text{S11})$$

Putting known values in eq S11, and dividing by 101325 to get  $p_A$  in atm

$$p_A = G_0 \left( \frac{8.314 \times 273.15}{48 \times 101325} \right) \quad (\text{S12})$$

We got our final equation (eq S13 or eq 7) as below.

$$p_A = 4.6693 \times 10^{-4} G_0 \quad (\text{S13})$$

**Note: Symbols which have not been defined here, may please be looked into the nomenclature of manuscript.**

## References

- (a) Hikita, H.; Asai, S. Gas absorption with (m, n)<sup>th</sup> order irreversible chemical reaction. *Int. Chem. Eng.* **1963**, 4, 823-830.
- (b) Lutz, O. M. D., Hofer, T. S., Randolph, B. R., Rode, B. M. Computational study of the cerium(III) ion in aqueous environment. *Chem. Phys. Lett.* **2012**, 539-540, 50-53.
- (c) Heyounia, A.; Roustana, M.; Do-Quangb, Z. Hydrodynamics and mass transfer in gas–liquid flow through static mixers. *Chem. Eng. Sci.* **2002**, 57, 3325-3333.
